# Supplementary material for: Structural and functional characterization of TesB from Yersinia pestis reveals a unique octameric arrangement of hotdog domains
Source: PubMed Central journal article supplement (PMC4388271; doi:10.1107/s1399004715002527), 2015-03-27
Supplement: d-71-00986-sup1.pdf [file d-71-00986-sup1.pdf]

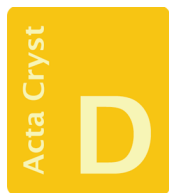

BIOLOGICAL  
CRYSTALLOGRAPHY

1

2 **Volume 71 (2015)**

3 **Supporting information for article:**

4 **Structural and functional characterization of TesB from *Yersinia***  
5 ***pestis* reveals a unique octameric arrangement of hotdog domains**

6 **C. M. D. Swarbrick, M. E. Perugini, N. Cowieson and J. K. Forwood**

7

8

1

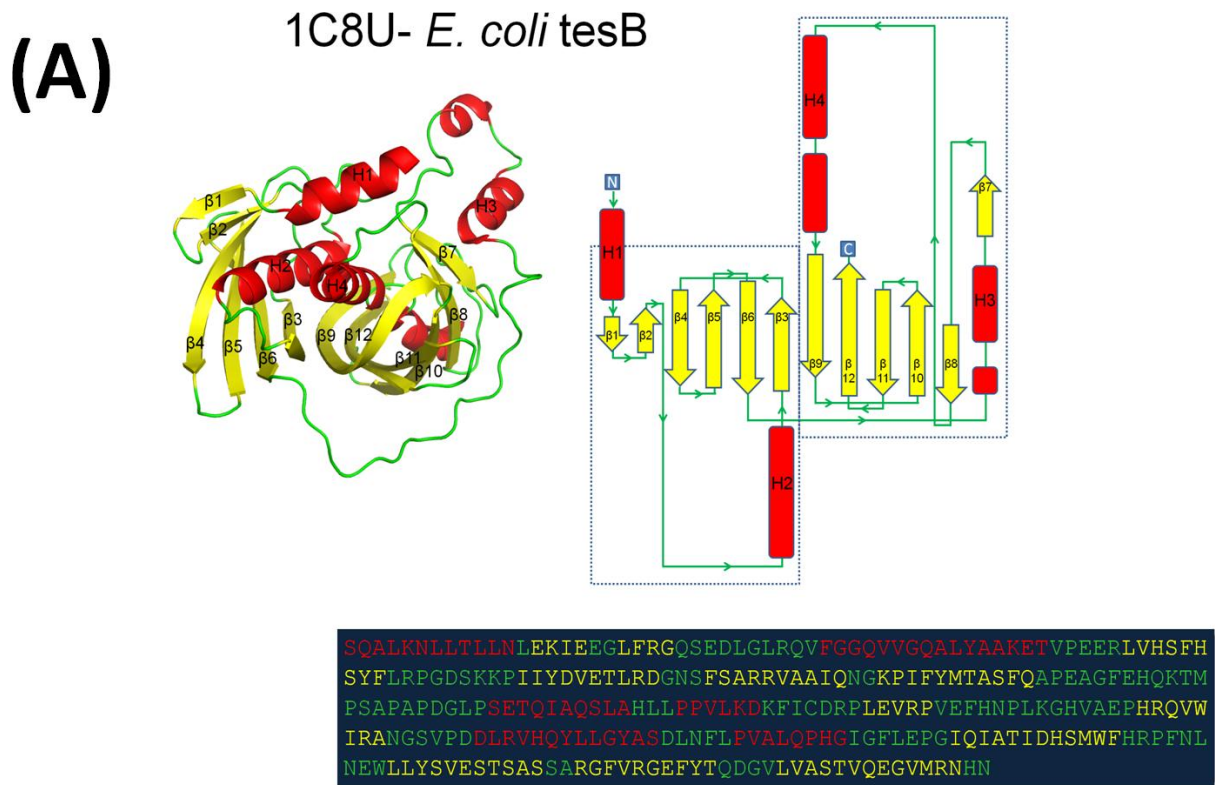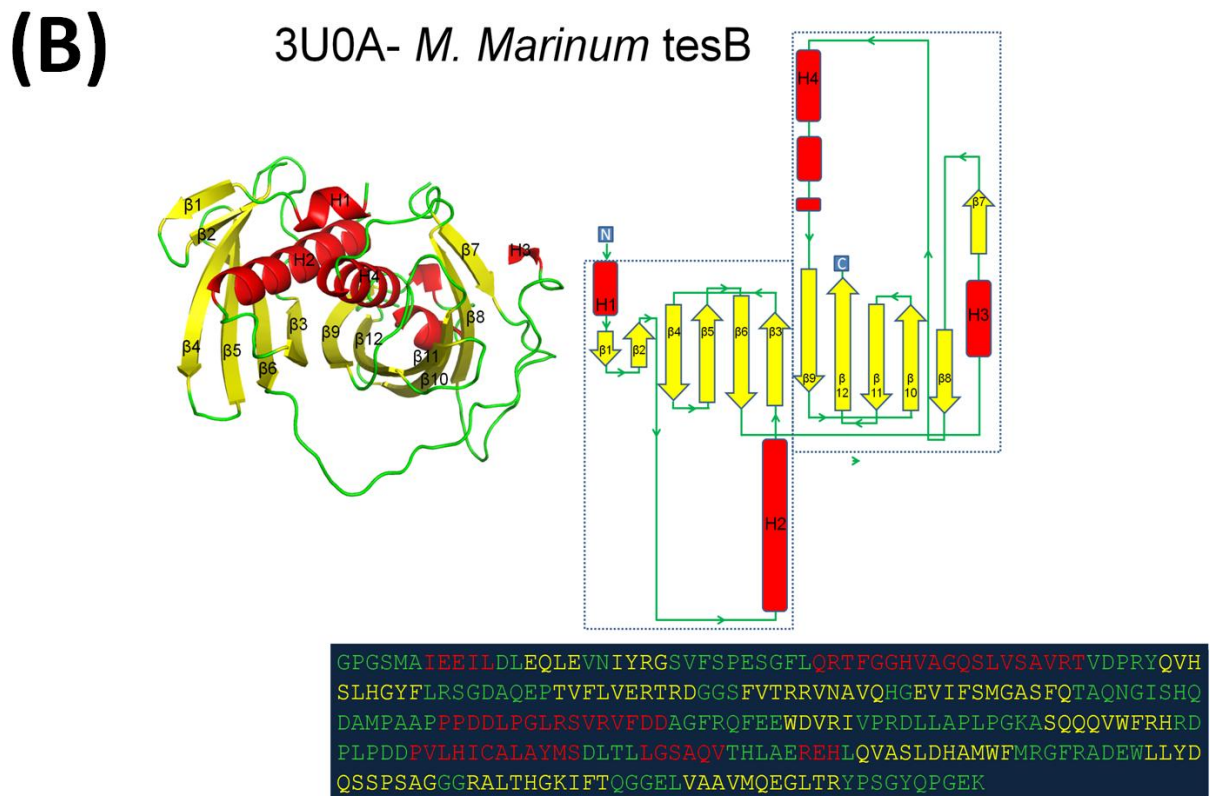

2

3 **Figure S1** The primary, secondary and tertiary structure of (A) *EctesB* and (B) *MptesB* with  $\alpha$ -  
4 helices coloured red,  $\beta$ -stands in yellow, and loops in green.

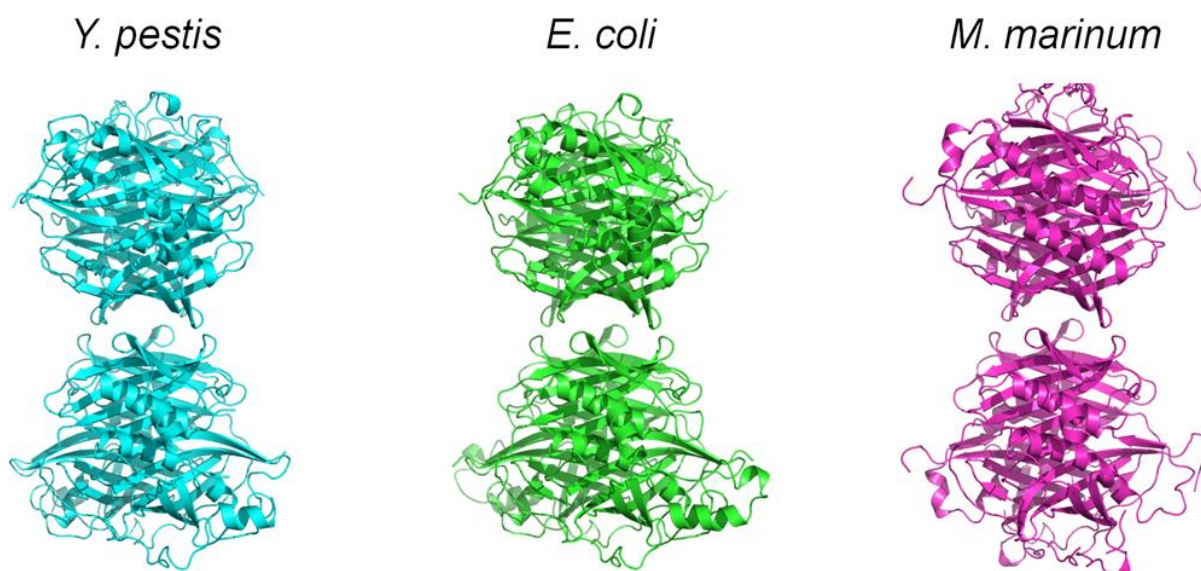

1

2 **Figure S2** Alternate view of the *Y. pestis*, *E. coli* and *M. marinum* structures.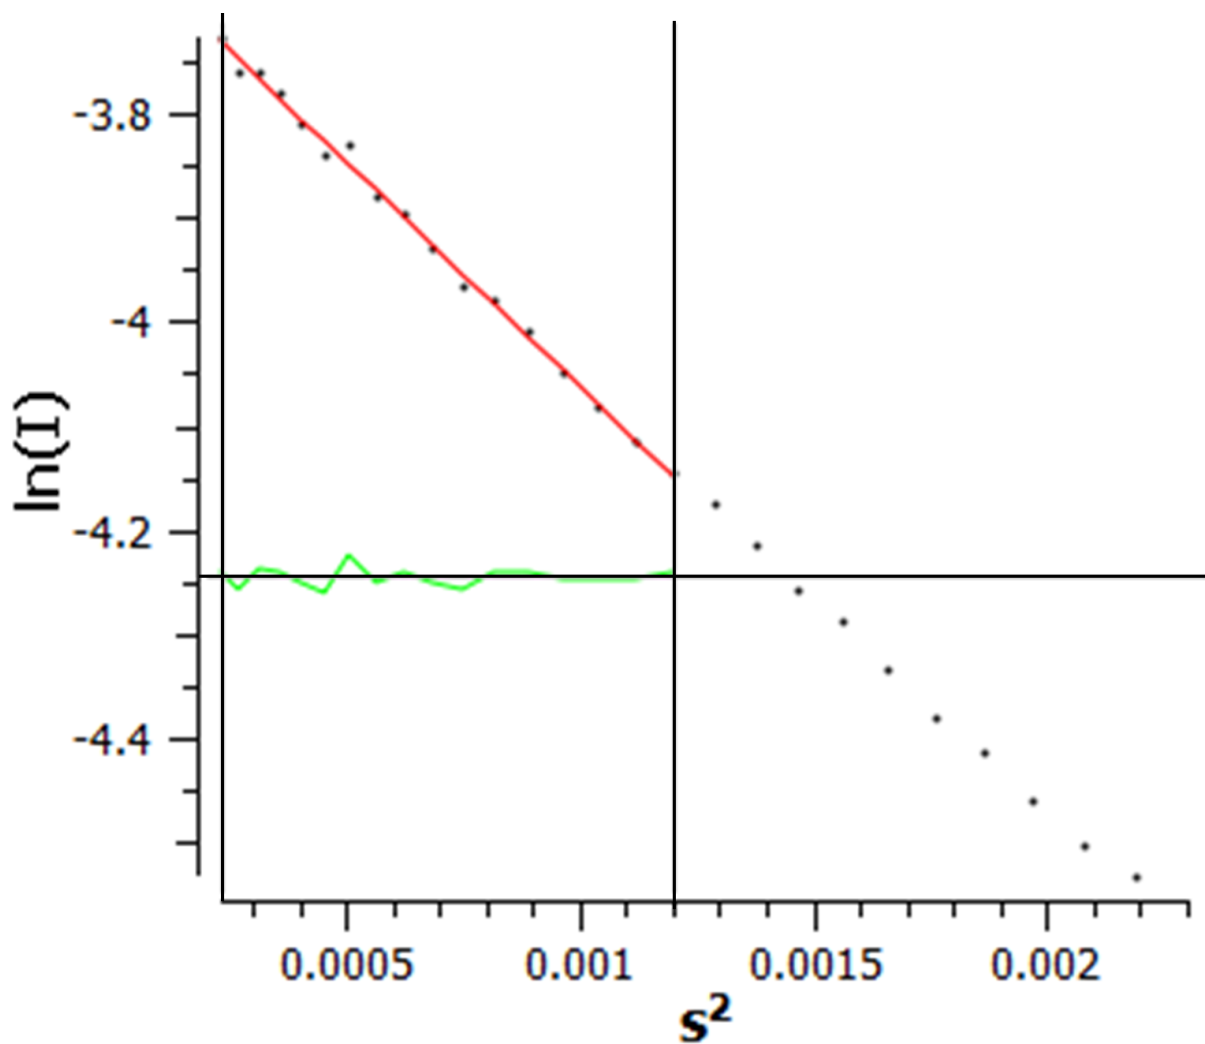

3

4 **Figure S3** Guinier plot of  $\ln(I)$  vs  $S^2$  demonstrating the protein sample from which SAXS data was  
5 derived is free of aggregation.

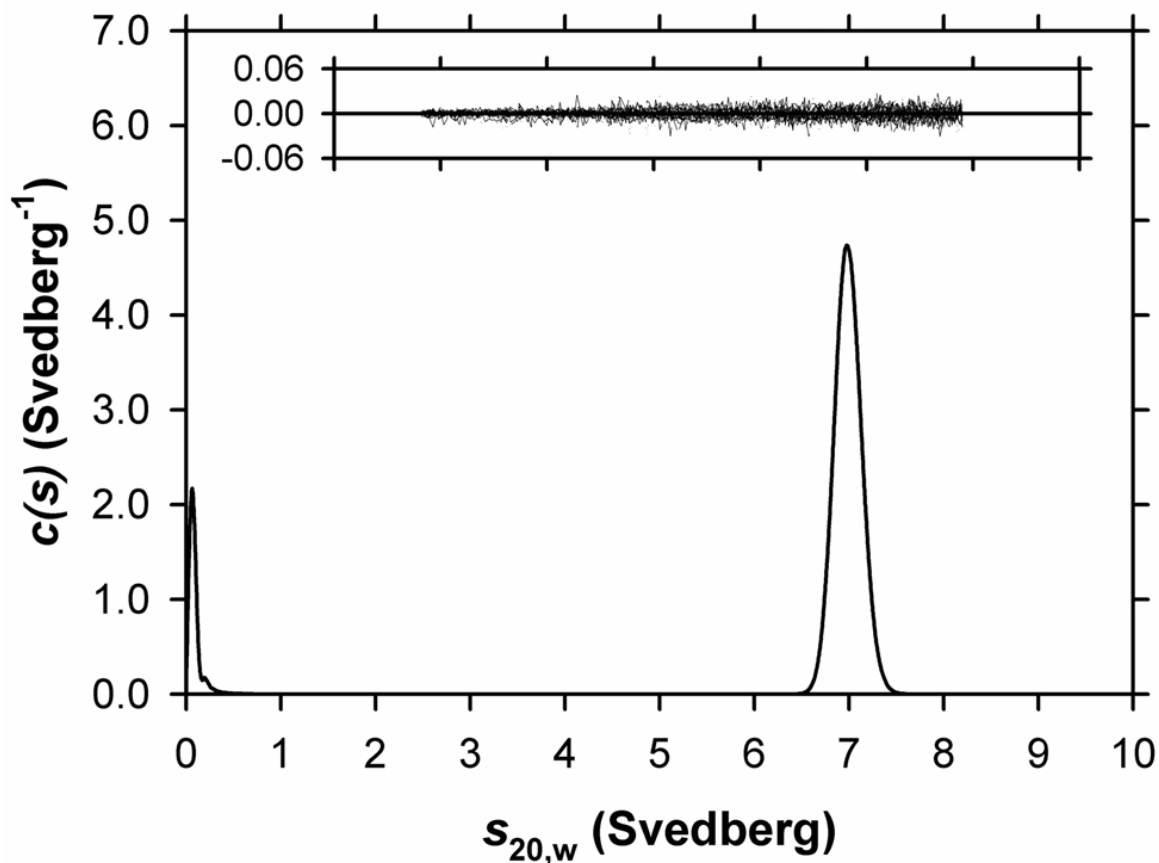

1

2

3 **Figure S4** Sedimentation velocity analysis of TesB. The continuous sedimentation coefficient [c(s)]

4 distribution is plotted as a function of standardized sedimentation (Svedberg) for TesB (2.4 mg/ml).

5 The sedimentation coefficient at the ordinate maximum of the peak shown corresponds to 7.0 S.

6 The c(s) distribution was calculated using 200 sedimentation coefficients from 0 to 10 S at a P-value

7 of 0.95, which resulted in a RMSD of 0.00686, Runs test  $Z = 7.39$  and yielded a frictional ratio of

8 1.28. Inset - Residuals for the c(s) best fit plotted as a function of radial position.

9
